# Supplementary material for: Glucose Detection of 4-Mercaptophenylboronic Acid-Immobilized Gold-Silver Core-Shell Assembled Silica Nanostructure by Surface Enhanced Raman Scattering
Source: PubMed Central journal article supplement (PMC8068217; doi:10.3390/nano11040948), 2021-04-08
Supplement: nanomaterials-11-00948-s001.pdf [file nanomaterials-11-00948-s001.pdf]

# Glucose detection of 4-mercaptophenylboronic acid-gold-silver core-shell assembled silica nanostructure by Surface enhanced Raman scattering.

Xuan-Hung Pham <sup>1</sup>, Bomi Seong <sup>1</sup>, Eunil Hahm <sup>1</sup>, Kim-Hung Huynh <sup>1</sup>, Yoon-Hee Kim <sup>1</sup>, Jaehi Kim <sup>1</sup>, Sang Hun Lee <sup>2</sup>, and Bong Hyun Jun <sup>2,\*</sup>

1 Department of Bioscience and Biotechnology, Konkuk University, Seoul 05029, Republic of Korea

2 Department of Chemical and Biological Engineering, Hanbat National University, Daejeon 34158, Republic of Korea.

\* Correspondence: [bjun@konkuk.ac.kr](mailto:bjun@konkuk.ac.kr) (B-H. J); Tel.: +82-2-450-0521 (B.H.J.)

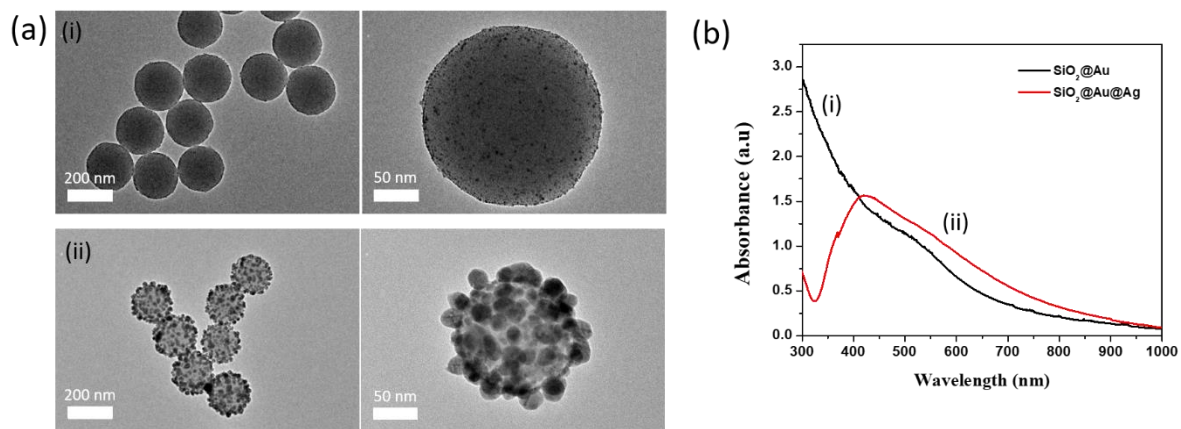

**Figure S1.** (a) TEM images and (b) UV-Vis spectra of (i) SiO<sub>2</sub>@Au (1 mg/mL) and (ii) SiO<sub>2</sub>@Au@Ag nanostructures (20 μg/mL) synthesized at 2 mg SiO<sub>2</sub>@NH<sub>2</sub> and 300 mM Ag<sup>+</sup> concentration.

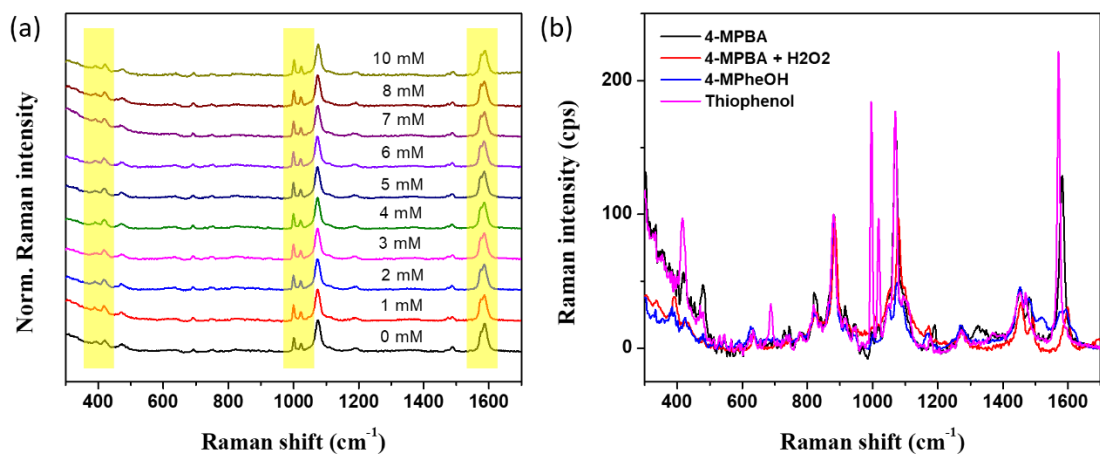

**Figure S2.** (a) SERS spectra of SiO<sub>2</sub>@Au@Ag@4-MPBA in PBST containing difference concentration of glucose (0-10 mM). (b) SERS spectra of SiO<sub>2</sub>@Au@Au in ethanol in the presence of 50 μM 4-mercaptophenylboronic acid, 50 μM 4-mercaptophenylboronic acid + 1000 μg/mL H<sub>2</sub>O<sub>2</sub>, 1 mM 4-mercaptophenol, 1 mM thiophenol.

**Table S1.** Raman frequencies and assignments of 4-MPBA and 4-MPheOH in EtOH and PBST

| Assignment                                      | 4-MPBA<br>in EtOH | 4-MPheOH<br>in EtOH | 4-MPBA<br>in PBST |
|-------------------------------------------------|-------------------|---------------------|-------------------|
| 8a(a <sub>1</sub> ), $\nu_{CC}$                 | 1583              | 1597<br>1583        | 1583<br>1578      |
| 19a(a <sub>1</sub> ), $\nu_{CC}$                | 1484              | 1484                | 1484              |
| $\nu_{BO}$                                      | 1346              |                     |                   |
| 3(b <sub>2</sub> ), $\beta_{CH} + \beta_{BOH}$  | 1286              |                     |                   |
| 9a(a <sub>1</sub> ), $\beta_{CH} + \beta_{BOH}$ | 1192              |                     | 1192              |
|                                                 |                   | 1170                |                   |
| 1(a <sub>1</sub> ), $\beta_{CCC} + \nu_{CS}$    | 1077              |                     | 1077              |
| 18a(a <sub>1</sub> ), $\beta_{CH}$              |                   |                     | 1025              |
| 12(a <sub>1</sub> ), $\beta_{CCC}$              |                   |                     | 999               |
| 10a(a <sub>2</sub> ), $\gamma_{CH}$             | 820               | 824                 | 824               |
| 11(b <sub>1</sub> ), $\gamma_{CH}$              | 744               | 744                 | 752               |
|                                                 | 728               |                     |                   |
| 6a(a <sub>1</sub> ), $\beta_{CCC} + \nu_{CS}$   | 690               |                     | 693               |
| $\nu_{CS}$                                      | 632               | 625                 | 638               |
| 6b(b <sub>1</sub> ), $\beta_{CCC}$              |                   |                     | 612               |
| 16b(b <sub>1</sub> ), $\beta_{CCC}$             | 473               | 473                 | 473               |
| 7a(a <sub>1</sub> ), $\beta_{CCC} + \nu_{CS}$   | 417               | 417                 | 417               |
|                                                 |                   | 390                 |                   |

v: stretching;  $\beta$ : in-plane bending;  $\gamma$ : out-plane bending.

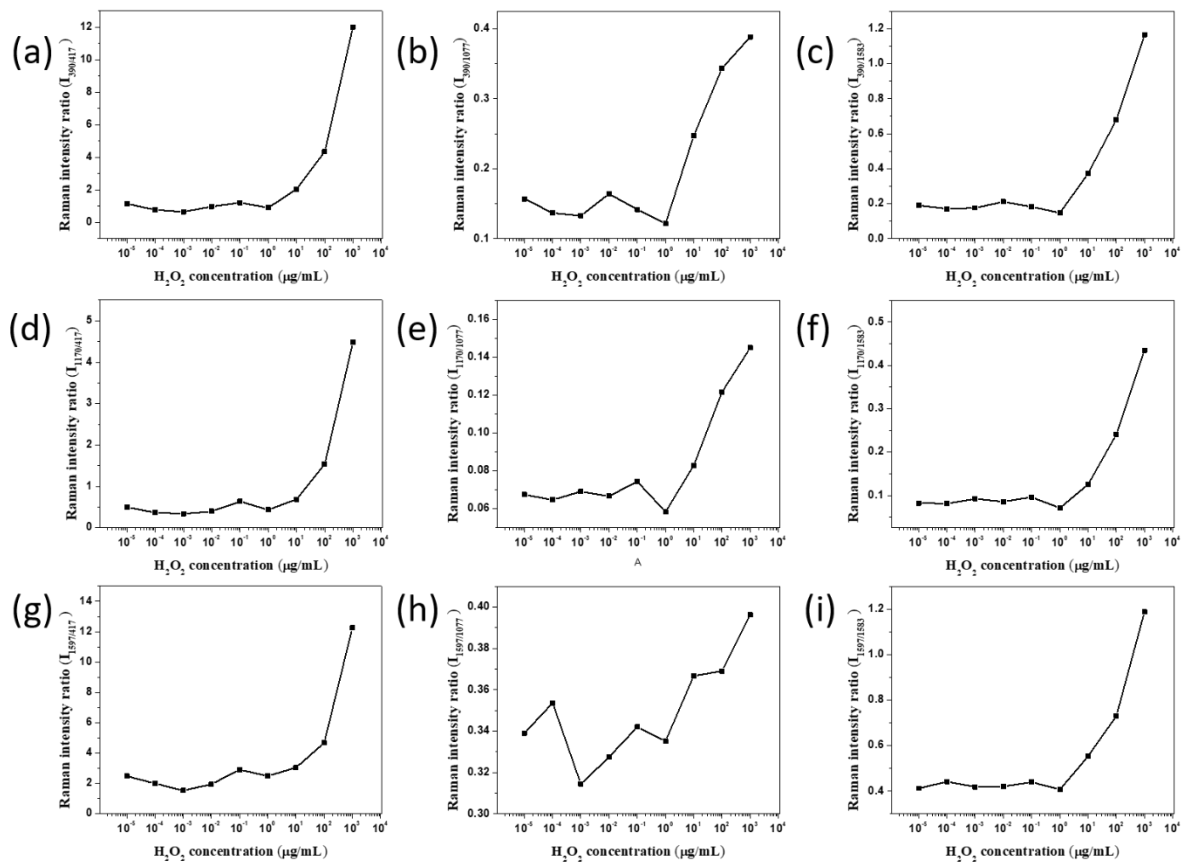

**Figure S3.** Normalized Raman intensity ratio of 20  $\mu\text{g}$   $\text{SiO}_2@Au@Ag@4\text{-MPBA}$  in PBST containing various concentration of  $H_2O_2$  in the range of  $10^{-6} - 10^3$   $\mu\text{g/mL}$  at (a) 390/417; (b) 390/1077; (c) 390/1583; (d) 1170/417; (e) 1170/1077; (f) 1170/1583; (g) 1597/417; (h) 1597/1077 and (i) 1597/1583.

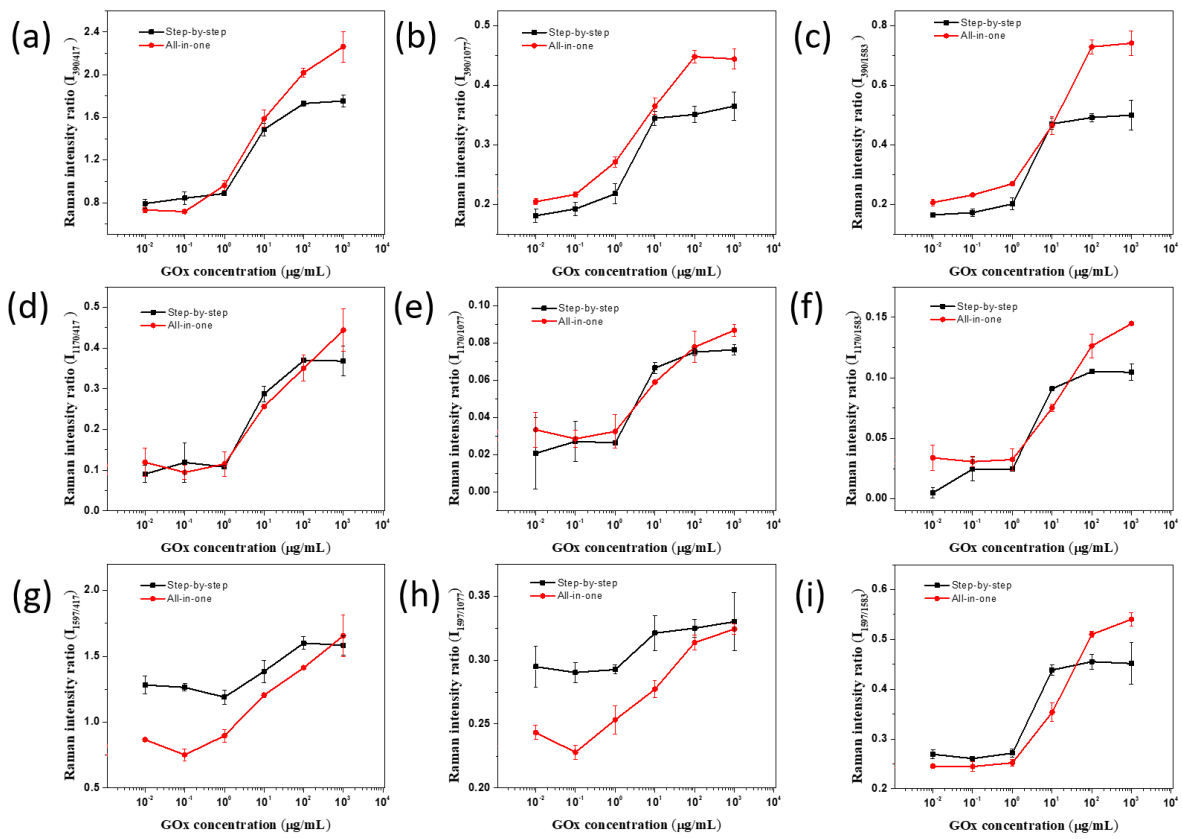

**Figure S4.** Normalized Raman intensity ratio of  $20 \mu\text{g SiO}_2@Au@Ag@4\text{-MPBA}$  in PBST containing 5 mM glucose and difference concentration of glucose oxidase in the range of  $10^{-2} - 10^3 \mu\text{g/mL}$  at (a) 390/417; (b) 390/1077; (c) 390/1583; (d) 1170/417; (e) 1170/1077, (f) 1170/1583, (g) 1597/417, (h) 1597/1077 and (i) 1597/1583.

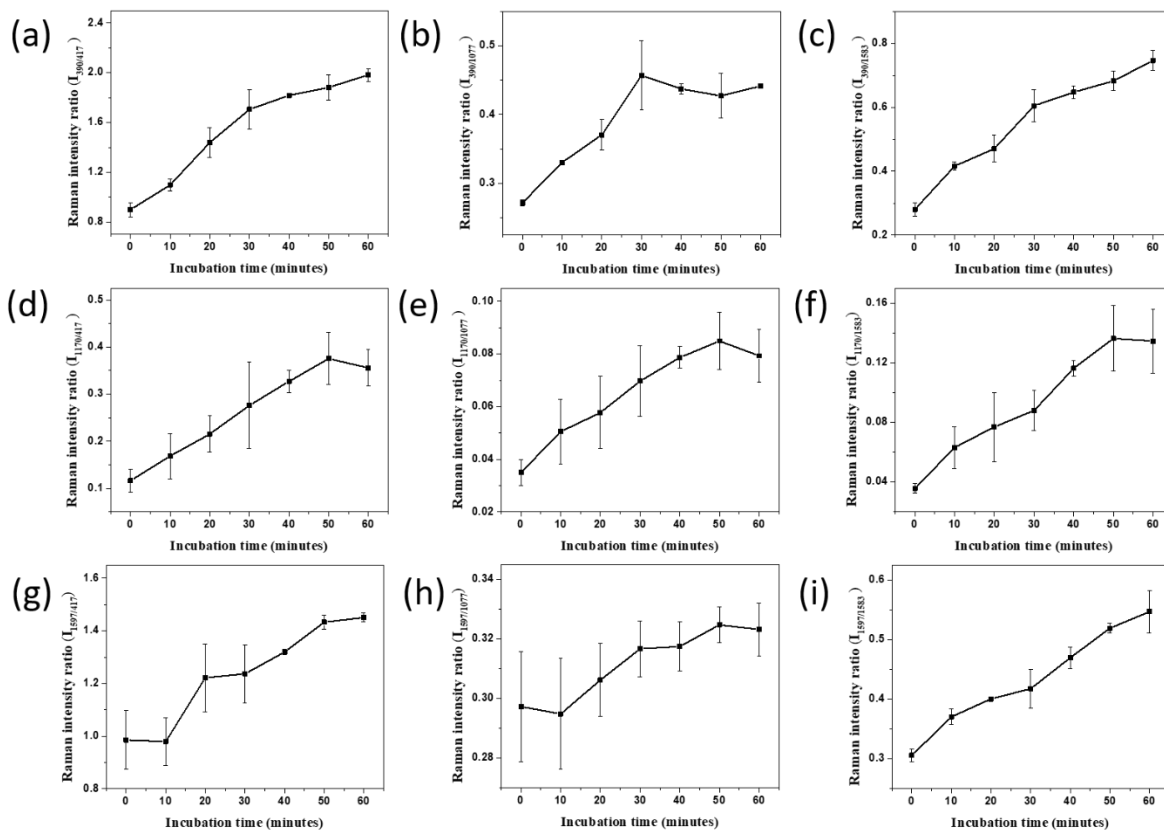

**Figure S5.** Normalized Raman intensity ratio of 20  $\mu\text{g}$   $\text{SiO}_2@Au@Ag@4\text{-MPBA}$  in PBST containing 5 mM glucose and 100  $\mu\text{g/mL}$  glucose oxidase at different incubation time at (a) 390/417; (b) 390/1077; (c) 390/1583; (d) 1170/417; (e) 1170/1077, (f) 1170/1583, (g) 1597/417, (h) 1597/1077 and (i) 1597/1583.

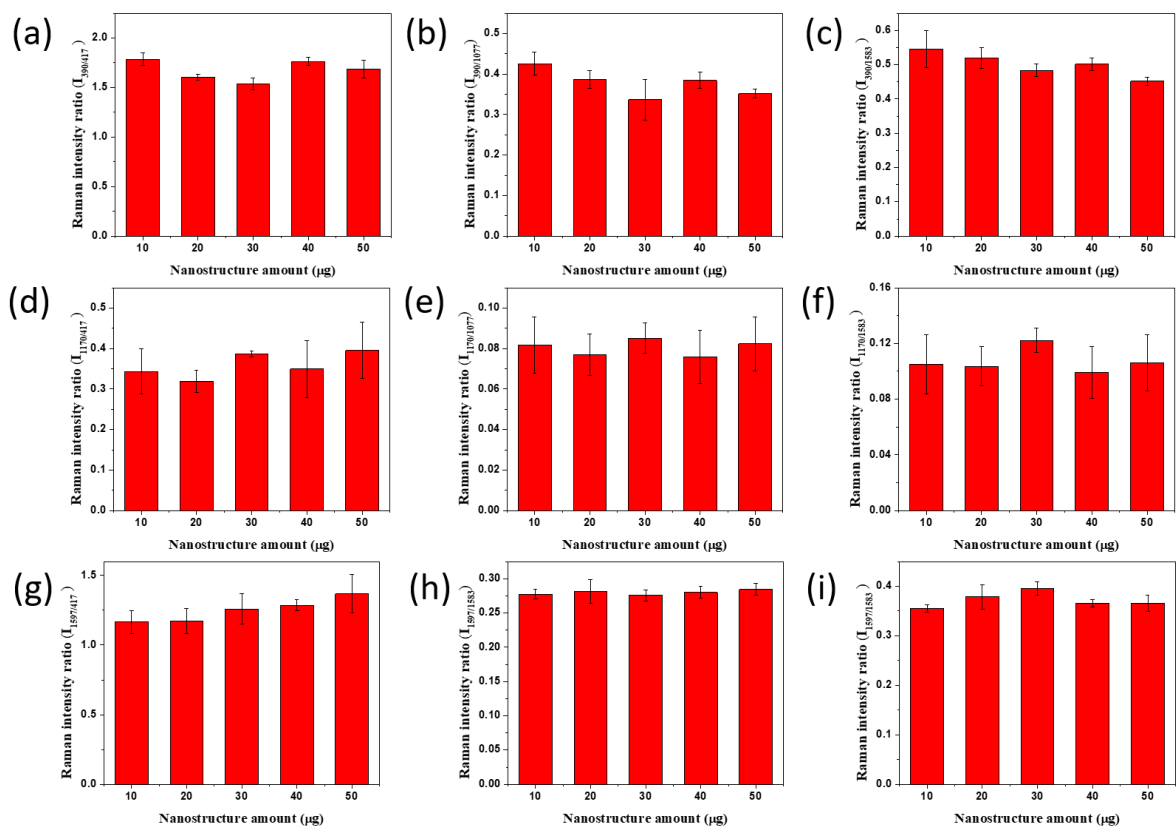

**Figure S6.** Normalized Raman intensity ratio of SiO<sub>2</sub>@Au@Ag@4-MPBA using different amount of SiO<sub>2</sub>@Au@Ag (10 - 50 µg) in PBST containing 5 mM glucose, 100 µg/mL glucose oxidase for 1 hr at (a) 390/417; (b) 390/1077; (c) 390/1583; (d) 1170/417; (e) 1170/1077, (f) 1170/1583, (g) 1597/417, (h) 1597/1077 and (i) 1597/1583.



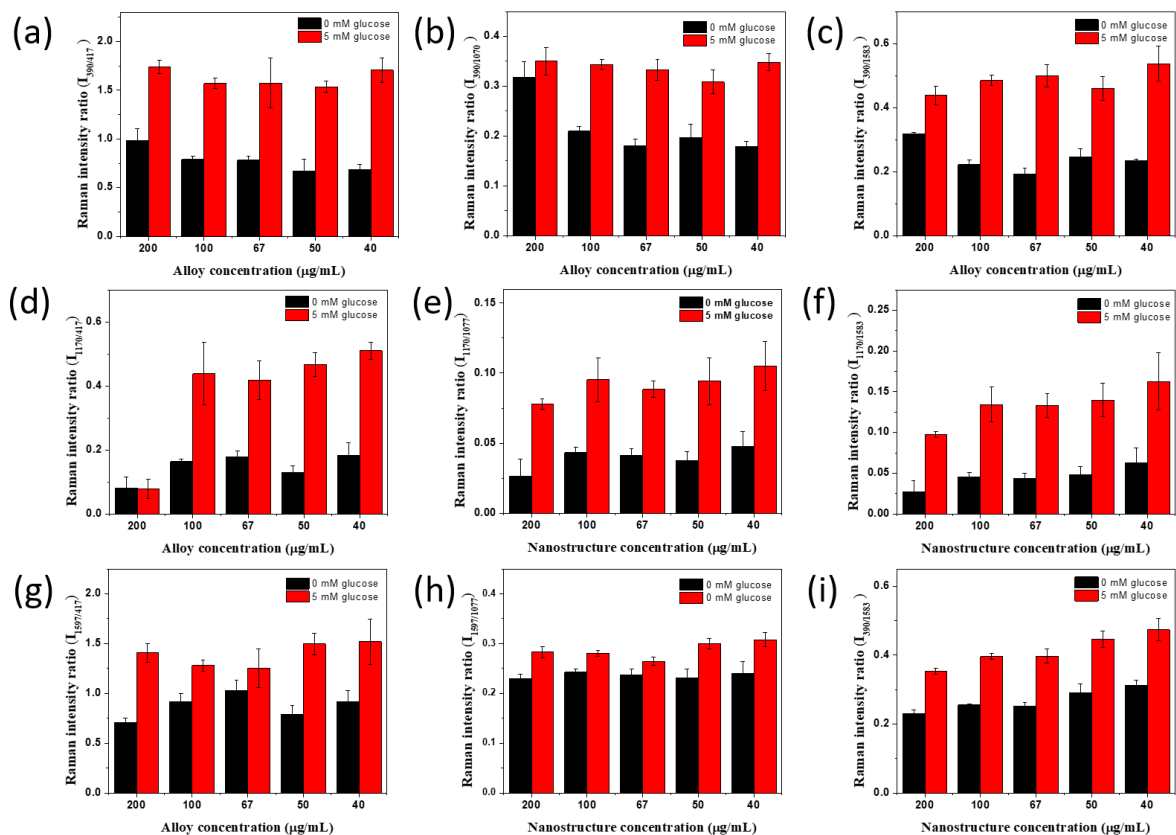

**Figure S7.** Normalized Raman intensity ratio of 20  $\mu\text{g}$   $\text{SiO}_2\text{@Au@Ag@4-MPBA}$  in PBST containing 5 mM glucose, 100  $\mu\text{g/mL}$  glucose oxidase for 1 h and measure at different concentration of  $\text{SiO}_2\text{@Au@Ag}$  at (a) 390/417; (b) 390/1077; (c) 390/1583; (d) 1170/417; (e) 1170/1077, (f) 1170/1583, (g) 1597/417, (h) 1597/1077 and (i) 1597/1583.

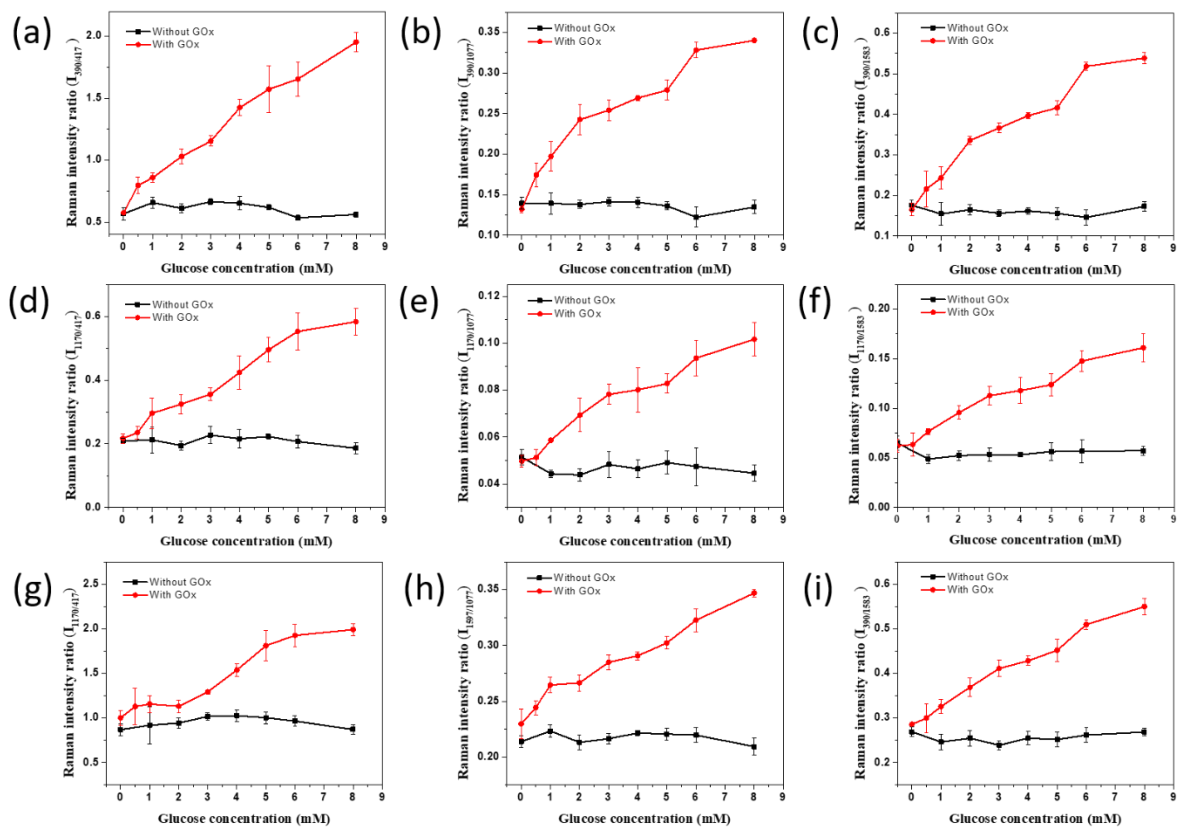

**Figure S8.** Glucose detection by  $\text{SiO}_2@\text{Au}@\text{Au}@4\text{-MPBA}$  at optimized condition of  $20 \mu\text{g}$   $\text{SiO}_2@\text{Au}@\text{Ag}$ ,  $100 \mu\text{g/mL}$  glucose oxidase concentration for 1h and Raman measurement at  $67 \mu\text{g/mL}$   $\text{SiO}_2@\text{Au}@\text{Ag}$  in PBST at (a) 390/417; (b) 390/1077; (c) 390/1583; (d) 1170/417; (e) 1170/1077, (f) 1170/1583, (g) 1597/417, (h) 1597/1077 and (i) 1597/1583.

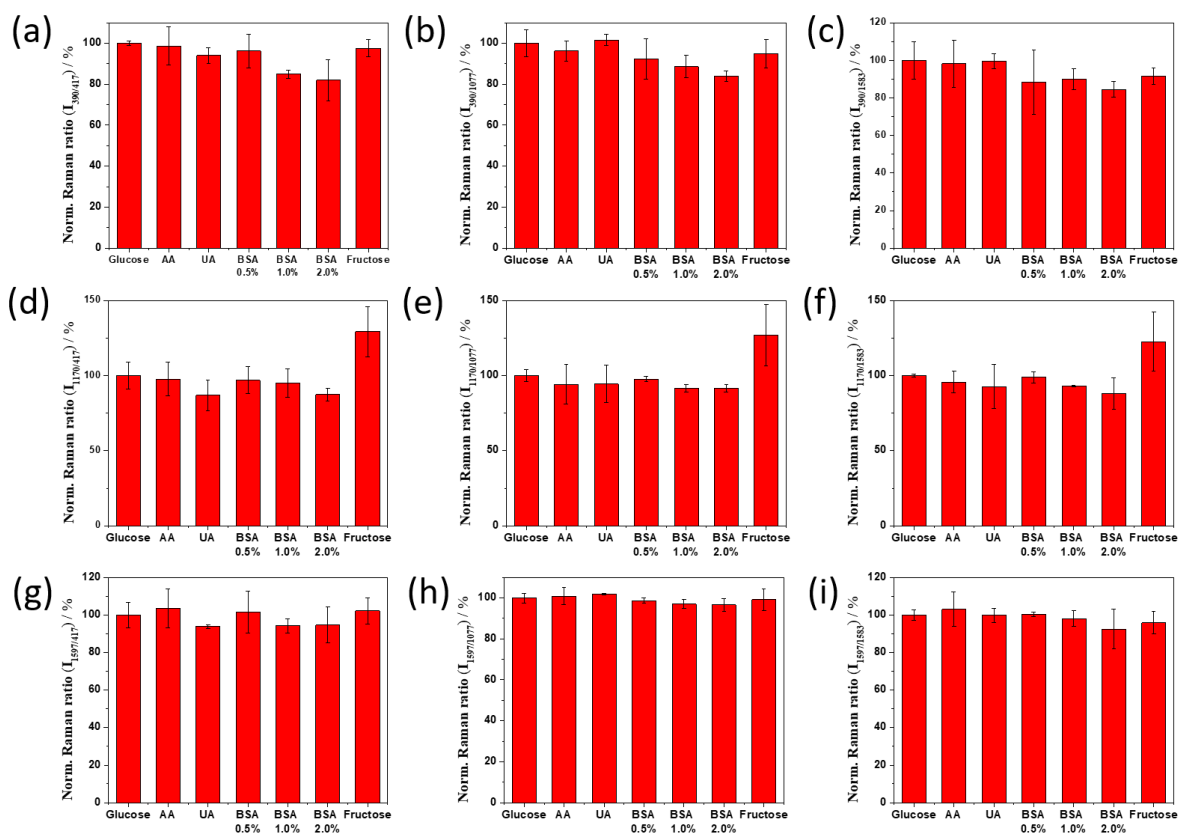

**Figure S9.** Effect of interferences on SERS signal of SiO<sub>2</sub>@Au@Ag@4-MPBA in 5 mM glucose by SiO<sub>2</sub>@Au@Au@4-MPBA at optimized condition of 20 μg SiO<sub>2</sub>@Au@Ag, 100 μg/mL glucose oxidase concentration for 1h and Raman measurement at 67 μg/mL SiO<sub>2</sub>@Au@Ag in PBST at (a) 390/417; (b) 390/1077; (c) 390/1583; (d) 1170/417; (e) 1170/1077, (f) 1170/1583, (g) 1597/417, (h) 1597/1077 and (i) 1597/1583.

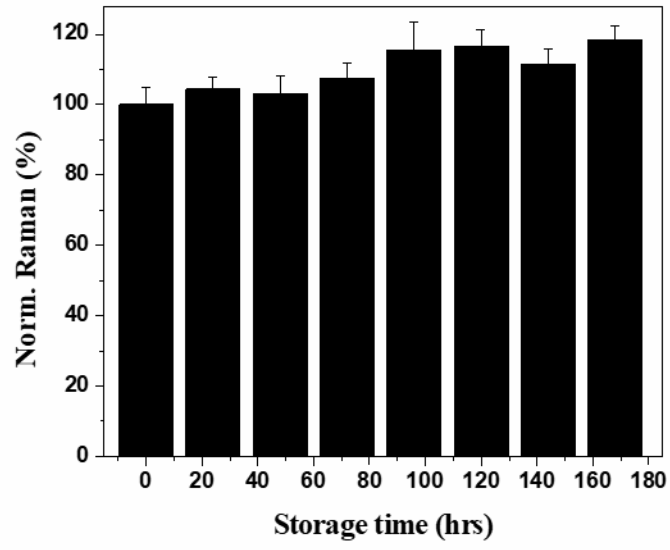

Figure S10. Long-term storage of 200 µg/mL SiO<sub>2</sub>@Au@Ag@4-MPBA at 4°C in ethanol solution.
